# Supplementary material
Source: publisher site journal article supplement (https://www.dovepress.com/article/503648)
Supplement: Supplementary file 1 [file get_supplementary_file.php]

Supplementary Material

# Supplemental material and methods

- 1. **Baseline examination**

Anthropometric assessments were conducted by trained nursing staff. Height and weight measurements were obtained using standardized protocols, ensuring accuracy to 0.1 cm and 0.1 kg, respectively. Waist circumference (WC) was determined at the level midway between the lower border of the last palpable rib and the top of the iliac crest, with participants standing and feet positioned together. Measurements were taken at the end of a normal expiration, with two readings recorded for each participant. The average of the two closest readings was utilized for analysis.

Current smoking status was defined based on a history of smoking at least 100 cigarettes in one's lifetime and current smoking habits. Alcohol consumption was assessed through inquiries about the types of alcoholic beverages consumed, the frequency of weekly alcohol intake, and the typical quantity consumed per occasion. Individuals reporting weekly alcohol intake exceeding 140 g for men and 70 g for women were classified as having excessive alcohol consumption [1].

Blood pressure measurements were obtained using a mercury sphygmomanometer following a period of at least 10 minutes of quiet rest. Multiple readings were taken, and the average values were recorded for systolic and diastolic blood pressure. All biochemical analyses were conducted on blood samples collected after an overnight fast.

**1.2 Definition**

Body mass index (BMI) was calculated as the weight in kilograms divided by the square of the height in meters. Hypertension was diagnosed based on self-reported history of hypertension, current use of antihypertensive medications, or systolic blood pressure (SBP) of 140 mmHg or higher and/or diastolic blood pressure (DBP) of 90 mmHg or higher, recorded on at least three consecutive occasions. Diabetes mellitus (DM) was identified by fasting serum glucose levels of 7.0 mmol/L or higher, 2-hour serum glucose levels of 11.1 mmol/L or higher following an oral glucose tolerance test, or the current use of hypoglycemic agents or insulin. Dyslipidemia was determined by self-reported history of dyslipidemia and/or treatment with lipid-lowering medications. Coronary artery disease (CAD) was diagnosed based on the patient's self-reported history of myocardial infarction, percutaneous coronary intervention, or coronary artery bypass grafting.

Advanced liver fibrosis was defined by a Nonalcoholic Fatty Liver Disease (NAFLD) Fibrosis Score (NFS) of 0.676 or higher, or a Fibrosis-4 (FIB-4) score greater than 2.67 at baseline. Participants were excluded if they had an NFS less than -1.455 (less than 0.12 if aged 65 years or older) or a FIB-4 score less than 1.3 (less than 2.0 if aged 65 years or older) [2]. The NFS and FIB-4 scores were selected to identify participants with liver fibrosis due to their superior predictive accuracy compared to other scoring systems for the presence of liver fibrosis [3].

**1.3 Details of the statistical analyses**

To address missing data, we implemented nonparametric imputation using the missForest procedure in R. This method leverages a random forest algorithm to predict missing values based on the remaining variables in the dataset. The model's performance was assessed through internally cross-validated error estimation.

Clinical and demographic characteristics were summarized using appropriate statistical measures, including proportions for categorical variables, means with standard deviations (SD) for normally distributed continuous variables, and medians with interquartile ranges (IQR) for continuous variables exhibiting skewed distributions. To assess differences in characteristics across various patient subgroups, we employed the chi-square test for categorical variables. For continuous variables with normal distributions, one-way analysis of variance (ANOVA) was utilized, whereas the Kruskal-Wallis test was applied for those with skewed distributions.

To assess multicollinearity in the regression models, we utilized the variance inflation factor (VIF). Variables exhibiting a VIF of 10 or higher were excluded from the analysis (Figure S1). This threshold helps to mitigate the impact of multicollinearity on the stability and interpretability of the regression coefficients.

Subsequently, we employed multivariable logistic regression models to investigate the association between inflammatory biomarkers and the prevalence of metabolic associated fatty liver disease (MAFLD). The models were structured as follows:

- Model 1: Unadjusted (univariate analysis) to provide an initial assessment of the relationship between each biomarker and MAFLD.

- Model 2: Adjusted for age, sex, smoking status, alcohol consumption, and duration of hypertension.

- Model 3: Further adjusted for systolic blood pressure, diastolic blood pressure, body mass index, waist circumference, diabetes mellitus, dyslipidemia, and CAD to account for additional clinical factors that may influence the relationship.

- Model 4: Built upon Model 3 by incorporating additional biochemical markers, including aspartate aminotransferase (AST)/alanine aminotransferase (ALT), gamma-glutamyltransferase (GGT), serum creatinine (Scr), uric acid (UA), total cholesterol, triglyceride, high-density lipoprotein cholesterol (HDL-C), low-density lipoprotein cholesterol (LDL-C), fasing blood glucose, glycated hemoglobin (HbA1c), high-sensitivity C-reactive protein (hs-CRP), and triglyceride glucose (TyG) index.

- Model 5: Extended Model 4 by including the use of antidiabetic medications, lipid-lowering agents, and antihypertensive drugs to control for the potential effects of pharmacological interventions on the outcomes.

For each model, we calculated the odds ratio (OR) and the corresponding 95% confidence interval (CI) to quantify the strength and precision of the associations. The p-value for trend was determined by treating quartiles of the inflammatory biomarkers as a continuous variable within each model.

To further explore the dose-response relationship between the inflammatory biomarkers and the prevalence of MAFLD, we employed a generalized additive model (GAM). This approach allowed us to assess the nonlinear relationship and identify potential threshold effects by focusing on the smoothed curve fitting.

To ensure the robustness of our findings, we performed a series of sensitivity analyses to assess the stability of our results under different conditions. First, we conducted a sensitivity analysis to evaluate the impact of missing data by repeating the preliminary analysis after excluding subjects with incomplete covariate information at baseline. This approach allowed us to assess the potential bias that missing data might introduce into our estimates. Next, to verify the stability of the observed association between inflammatory biomarkers and the prevalence of MAFLD, we conducted an analysis excluding outliers. Specifically, we removed participants whose inflammatory biomarker values were more than three SD from the mean (either less than -3SD or more than +3SD). This criterion was applied to minimize the influence of extreme values on our analytical outcomes. Third, to assess the influence of alcohol abuse, we repeated the main analysis after excluding participants with a history of alcohol abuse at baseline. This step was taken to determine whether alcohol abuse could confound the relationship between inflammatory biomarkers and MAFLD. Furthermore, to evaluate the impact of severe liver fibrosis, we conducted the primary analysis again after excluding participants with evidence of severe liver fibrosis at baseline. This exclusion was necessary to understand the potential confounding effect of advanced liver disease on the observed associations. Finally, we calculated E-values to assess the robustness of our primary outcome to the presence of unmeasured confounders. The E-value provides an estimate of the minimum strength of association that an unmeasured confounder would need to have with both the exposure and outcome to fully explain away the observed association. This metric offers a valuable perspective on the potential impact of unmeasured variables on our study findings. All sensitivity analyses were conducted using the same statistical models and assumptions as the primary analysis to ensure consistency and comparability of results.

In this stratified analysis, we aimed to identify potential effect modifiers of the association between inflammatory biomarkers and the prevalence of MAFLD. The analysis incorporated the following covariates: sex (male, female), age (<60 years, ≥60 years), current smoking status (yes, no), current alcohol consumption status (yes, no), presence of diabetes mellitus (yes, no), presence of dyslipidemia (yes, no), and presence of CAD (yes, no). To assess heterogeneity across subgroups, we employed logistic regression models. The results are graphically represented in forest plots, which facilitate the visualization of the effect estimates and their confidence intervals across different strata. Interactions between subgroups and inflammatory biomarkers were statistically evaluated using likelihood ratio tests, allowing us to determine whether the association between inflammatory biomarkers and MAFLD risk varied significantly across the subgroups defined by the covariates.

In this study, we assessed the diagnostic accuracy of multiple biomarkers for the identification of MAFLD. We constructed receiver operating characteristic (ROC) curves for the following biomarkers: the aggregate index of systemic inflammation (AISI), systemic inflammatory response index (SIRI), systemic immune inflammation index (SII), neutrophil to lymphocyte ratio (NLR), platelet to lymphocyte ratio (PLR), and monocyte to lymphocyte ratio (MLR). For each biomarker, we calculated the area under the ROC curve (AUC), which quantifies the test's discriminatory ability to distinguish between individuals with and without MAFLD. Furthermore, we determined the sensitivities, specificities, positive predictive values, and negative predictive values to evaluate the predictive performance of these indices in diagnosing MAFLD.

We also conducted a clinical decision curve analysis (DCA) to assess the net benefit of various biomarkers in predicting MAFLD at different risk thresholds. The DCA curves, which plot threshold probabilities on the x-axis against standardized net benefits on the y-axis, were utilized to gauge the performance of the models. These benefits were calculated from the trade-off between true positive rates (benefits) and false positive rates (costs). The analysis compared the DCA curves with two null strategies: treating all patients ("All" line) and treating none ("None" line), thereby evaluating the net benefit of the models over passive or universal treatment approaches. This method offers a comprehensive evaluation of the clinical applicability and decision-making impact of the predictive models.

The statistical analyses were performed using R software, version 4.1.1 (R Foundation for Statistical Computing), with statistical significance defined as a 2-sided P value less than 0.05.

# **Supplementary Tables**

**Table S1**. Sensitivity analysis excludes participants with any missing values.

| Exposure | Model 1 | Model 2 | Model 3 | Model 4 | Model 5 |
| --- | --- | --- | --- | --- | --- |
| OR (95% CI) | OR (95% CI) | OR (95% CI) | OR (95% CI) | OR (95% CI) |
| AISI (per SD increase) | 1.63 (1.59, 1.67) | 1.63 (1.59, 1.67) | 1.63 (1.59, 1.67) | 1.63 (1.59, 1.67) | 1.64 (1.60, 1.68) |
| AISI quartiles |  |  |  |  |  |
| Q1 (<121.91) | 1 (reference) | 1 (reference) | 1 (reference) | 1 (reference) | 1 (reference) |
| Q2 (121.91-185.83) | 1.22 (1.15, 1.30) | 1.22 (1.15, 1.30) | 1.22 (1.15, 1.30) | 1.22 (1.15, 1.30) | 1.22 (1.15, 1.30) |
| Q3 (185.83-279.52) | 2.09 (1.97, 2.22) | 2.09 (1.96, 2.22) | 2.09 (1.97, 2.23) | 2.09 (1.97, 2.23) | 2.10 (1.97, 2.23) |
| Q4 (≥279.53) | 3.21 (3.02, 3.42) | 3.20 (3.00, 3.41) | 3.20 (3.00, 3.41) | 3.21 (3.01, 3.42) | 3.22 (3.03, 3.44) |
| P for trend | <0.001 | <0.001 | <0.001 | <0.001 | <0.001 |
| SIRI (per SD increase) | 1.56 (1.52, 1.59) | 1.55 (1.52, 1.59) | 1.55 (1.52, 1.59) | 1.55 (1.52, 1.59) | 1.56 (1.52, 1.59) |
| SIRI quartiles |  |  |  |  |  |
| Q1 (<0.55) | 1 (reference) | 1 (reference) | 1 (reference) | 1 (reference) | 1 (reference) |
| Q2 (0.55-0.78) | 1.38 (1.30, 1.47) | 1.38 (1.30, 1.47) | 1.38 (1.30, 1.47) | 1.38 (1.30, 1.47) | 1.38 (1.30, 1.47) |
| Q3 (0.78-1.11) | 1.99 (1.87, 2.11) | 1.98 (1.87, 2.11) | 1.99 (1.87, 2.11) | 1.99 (1.87, 2.11) | 1.99 (1.87, 2.12) |
| Q4 (≥1.11) | 3.19 (3.00, 3.40) | 3.18 (2.98, 3.38) | 3.18 (2.98, 3.39) | 3.18 (2.99, 3.39) | 3.19 (3.00, 3.40) |
| P for trend | <0.001 | <0.001 | <0.001 | <0.001 | <0.001 |
| SII (per SD increase) | 1.50 (1.46, 1.53) | 1.49 (1.46, 1.53) | 1.49 (1.46, 1.53) | 1.49 (1.46, 1.53) | 1.50 (1.46, 1.53) |
| SII quartiles |  |  |  |  |  |
| Q1 (<333.66) | 1 (reference) | 1 (reference) | 1 (reference) | 1 (reference) | 1 (reference) |
| Q2 (333.68-450.17) | 1.35 (1.27, 1.43) | 1.35 (1.27, 1.43) | 1.35 (1.27, 1.43) | 1.34 (1.26, 1.43) | 1.34 (1.26, 1.43) |
| Q3 (450.17-611.37) | 1.98 (1.86, 2.10) | 1.97 (1.86, 2.10) | 1.98 (1.86, 2.10) | 1.98 (1.86, 2.10) | 1.98 (1.86, 2.10) |
| Q4 (≥611.39) | 2.89 (2.71, 3.07) | 2.87 (2.69, 3.05) | 2.87 (2.69, 3.05) | 2.87 (2.70, 3.06) | 2.88 (2.70, 3.07) |
| P for trend | <0.001 | <0.001 | <0.001 | <0.001 | <0.001 |
| NLR (per SD increase) | 1.37 (1.34, 1.40) | 1.37 (1.34, 1.40) | 1.37 (1.34, 1.40) | 1.37 (1.34, 1.40) | 1.37 (1.34, 1.40) |
| NLR quartiles |  |  |  |  |  |
| Q1 (<1.49) | 1 (reference) | 1 (reference) | 1 (reference) | 1 (reference) | 1 (reference) |
| Q2 (1.49-1.89) | 1.32 (1.24, 1.40) | 1.31 (1.24, 1.40) | 1.32 (1.24, 1.40) | 1.32 (1.24, 1.40) | 1.32 (1.24, 1.40) |
| Q3 (1.89-2.43) | 1.58 (1.49, 1.68) | 1.58 (1.48, 1.68) | 1.58 (1.49, 1.68) | 1.58 (1.48, 1.68) | 1.58 (1.48, 1.68) |
| Q4 (≥2.43) | 2.31 (2.17, 2.45) | 2.29 (2.15, 2.44) | 2.29 (2.15, 2.44) | 2.29 (2.15, 2.44) | 2.29 (2.16, 2.44) |
| P for trend | <0.001 | <0.001 | <0.001 | <0.001 | <0.001 |
| PLR (per SD increase) | 1.22 (1.19, 1.24) | 1.22 (1.19, 1.24) | 1.22 (1.19, 1.24) | 1.22 (1.19, 1.24) | 1.22 (1.19, 1.24) |
| PLR quartiles |  |  |  |  |  |
| Q1 (<101.92) | 1 (reference) | 1 (reference) | 1 (reference) | 1 (reference) | 1 (reference) |
| Q2 (101.92-126.79) | 1.15 (1.08, 1.22) | 1.15 (1.08, 1.22) | 1.15 (1.08, 1.22) | 1.15 (1.08, 1.22) | 1.15 (1.08, 1.22) |
| Q3 (126.79-158.28) | 1.36 (1.28, 1.44) | 1.35 (1.27, 1.44) | 1.35 (1.27, 1.44) | 1.35 (1.27, 1.44) | 1.35 (1.27, 1.44) |
| Q4 (≥158.28) | 1.62 (1.53, 1.73) | 1.62 (1.52, 1.72) | 1.62 (1.52, 1.72) | 1.62 (1.52, 1.72) | 1.62 (1.52, 1.72) |
| P for trend | <0.001 | <0.001 | <0.001 | <0.001 | <0.001 |
| MLR (per SD increase) | 1.35 (1.32, 1.38) | 1.34 (1.31, 1.37) | 1.34 (1.31, 1.37) | 1.34 (1.31, 1.37) | 1.34 (1.31, 1.37) |
| MLR quartiles |  |  |  |  |  |
| Q1 (<0.17) | 1 (reference) | 1 (reference) | 1 (reference) | 1 (reference) | 1 (reference) |
| Q2 (0.17-0.22) | 1.27 (1.20, 1.35) | 1.27 (1.20, 1.35) | 1.27 (1.20, 1.35) | 1.27 (1.19, 1.35) | 1.27 (1.20, 1.35) |
| Q3 (0.22-0.28) | 1.59 (1.50, 1.69) | 1.58 (1.49, 1.68) | 1.59 (1.49, 1.68) | 1.58 (1.49, 1.68) | 1.58 (1.49, 1.68) |
| Q4 (≥0.28) | 2.16 (2.03, 2.29) | 2.15 (2.02, 2.28) | 2.15 (2.02, 2.28) | 2.14 (2.02, 2.28) | 2.15 (2.02, 2.28) |
| P for trend | <0.001 | <0.001 | <0.001 | <0.001 | <0.001 |

Model 1: Unadjusted (univariate analysis).

Model 2: Adjusted for age, sex, smoking status, alcohol consumption, and duration of hypertension.

Model 3: Model 2 plus additional adjustments for systolic blood pressure, diastolic blood pressure, body mass index, waist circumference, diabetes mellitus, dyslipidemia, and coronary artery disease.

Model 4: Model 3 plus further adjustments for AST/ALT, GGT, serum creatinine, uric acid, total cholesterol, triglyceride, HDL-C, LDL-C, fasing blood glucose, HbA1c, hs-CRP, and TyG index.

Model 5: Model 4 plus adjustments for the use of antidiabetic medications, lipid-lowering agents, and antihypertensive drugs.

Abbreviations: SD, standard deviation; OR, odds ratio; CI, confidence interval. Other abbreviations are as defined in Table 1.

**Table S2**. Sensitivity analysis of the relationship between inflammatory biomarkers with MAFLD risk was performed after excluding outliers.

| Exposure | Model 1 | Model 2 | Model 3 | Model 4 | Model 5 |
| --- | --- | --- | --- | --- | --- |
| OR (95% CI) | OR (95% CI) | OR (95% CI) | OR (95% CI) | OR (95% CI) |
| AISI (per SD increase) | 1.74 (1.68, 1.80) | 1.73 (1.68, 1.79) | 1.73 (1.68, 1.79) | 1.74 (1.68, 1.80) | 1.74 (1.68, 1.80) |
| AISI quartiles |  |  |  |  |  |
| Q1 (<121.91) | 1 (reference) | 1 (reference) | 1 (reference) | 1 (reference) | 1 (reference) |
| Q2 (121.91-185.83) | 1.19 (1.11, 1.27) | 1.18 (1.11, 1.27) | 1.18 (1.11, 1.27) | 1.18 (1.11, 1.27) | 1.19 (1.11, 1.27) |
| Q3 (185.83-279.52) | 2.15 (2.01, 2.30) | 2.14 (2.00, 2.29) | 2.14 (2.00, 2.29) | 2.14 (2.00, 2.30) | 2.15 (2.01, 2.30) |
| Q4 (≥279.53) | 3.16 (2.95, 3.39) | 3.14 (2.93, 3.37) | 3.14 (2.93, 3.37) | 3.15 (2.94, 3.38) | 3.17 (2.96, 3.40) |
| P for trend | 1.50 (1.47, 1.53) | 1.50 (1.46, 1.53) | 1.50 (1.46, 1.53) | 1.50 (1.46, 1.53) | 1.50 (1.47, 1.53) |
| SIRI (per SD increase) | 1.62 (1.57, 1.67) | 1.61 (1.56, 1.66) | 1.61 (1.56, 1.66) | 1.61 (1.56, 1.66) | 1.62 (1.56, 1.67) |
| SIRI quartiles |  |  |  |  |  |
| Q1 (<0.55) | 1 (reference) | 1 (reference) | 1 (reference) | 1 (reference) | 1 (reference) |
| Q2 (0.55-0.78) | 1.36 (1.27, 1.45) | 1.35 (1.26, 1.45) | 1.35 (1.27, 1.45) | 1.35 (1.27, 1.45) | 1.35 (1.27, 1.45) |
| Q3 (0.78-1.11) | 1.96 (1.84, 2.10) | 1.96 (1.83, 2.09) | 1.96 (1.83, 2.10) | 1.96 (1.83, 2.10) | 1.96 (1.84, 2.10) |
| Q4 (≥1.11) | 3.21 (2.99, 3.44) | 3.19 (2.97, 3.42) | 3.19 (2.97, 3.42) | 3.19 (2.98, 3.43) | 3.21 (2.99, 3.45) |
| P for trend | 1.47 (1.44, 1.50) | 1.47 (1.44, 1.50) | 1.47 (1.44, 1.50) | 1.47 (1.44, 1.50) | 1.47 (1.44, 1.50) |
| SII (per SD increase) | 1.58 (1.53, 1.63) | 1.57 (1.52, 1.62) | 1.57 (1.52, 1.62) | 1.57 (1.52, 1.62) | 1.57 (1.53, 1.62) |
| SII quartiles |  |  |  |  |  |
| Q1 (<333.66) | 1 (reference) | 1 (reference) | 1 (reference) | 1 (reference) | 1 (reference) |
| Q2 (333.68-450.17) | 1.34 (1.26, 1.44) | 1.34 (1.25, 1.43) | 1.34 (1.25, 1.44) | 1.34 (1.25, 1.43) | 1.34 (1.25, 1.43) |
| Q3 (450.17-611.37) | 1.96 (1.84, 2.10) | 1.96 (1.83, 2.09) | 1.96 (1.83, 2.10) | 1.96 (1.83, 2.10) | 1.96 (1.83, 2.10) |
| Q4 (≥611.39) | 2.92 (2.72, 3.12) | 2.89 (2.70, 3.10) | 2.89 (2.70, 3.10) | 2.90 (2.70, 3.11) | 2.91 (2.72, 3.12) |
| P for trend | 1.43 (1.40, 1.46) | 1.43 (1.40, 1.46) | 1.43 (1.40, 1.46) | 1.43 (1.40, 1.46) | 1.43 (1.40, 1.46) |
| NLR (per SD increase) | 1.41 (1.37, 1.45) | 1.41 (1.37, 1.45) | 1.41 (1.37, 1.45) | 1.41 (1.37, 1.45) | 1.41 (1.37, 1.45) |
| NLR quartiles |  |  |  |  |  |
| Q1 (<1.49) | 1 (reference) | 1 (reference) | 1 (reference) | 1 (reference) | 1 (reference) |
| Q2 (1.49-1.89) | 1.33 (1.24, 1.42) | 1.33 (1.24, 1.42) | 1.33 (1.24, 1.42) | 1.33 (1.24, 1.42) | 1.33 (1.24, 1.42) |
| Q3 (1.89-2.43) | 1.58 (1.47, 1.69) | 1.57 (1.47, 1.68) | 1.57 (1.47, 1.68) | 1.57 (1.47, 1.68) | 1.57 (1.47, 1.68) |
| Q4 (≥2.43) | 2.30 (2.15, 2.46) | 2.28 (2.13, 2.44) | 2.28 (2.13, 2.45) | 2.29 (2.13, 2.45) | 2.29 (2.14, 2.45) |
| P for trend | 1.31 (1.28, 1.33) | 1.30 (1.27, 1.33) | 1.30 (1.27, 1.33) | 1.30 (1.27, 1.33) | 1.30 (1.28, 1.33) |
| PLR (per SD increase) | 1.23 (1.20, 1.26) | 1.23 (1.20, 1.26) | 1.23 (1.20, 1.26) | 1.23 (1.20, 1.26) | 1.23 (1.20, 1.26) |
| PLR quartiles |  |  |  |  |  |
| Q1 (<101.92) | 1 (reference) | 1 (reference) | 1 (reference) | 1 (reference) | 1 (reference) |
| Q2 (101.92-126.79) | 1.17 (1.10, 1.25) | 1.17 (1.09, 1.25) | 1.17 (1.09, 1.25) | 1.17 (1.09, 1.25) | 1.17 (1.09, 1.25) |
| Q3 (126.79-158.28) | 1.38 (1.29, 1.47) | 1.37 (1.28, 1.47) | 1.37 (1.28, 1.47) | 1.37 (1.28, 1.47) | 1.37 (1.28, 1.47) |
| Q4 (≥158.28) | 1.65 (1.55, 1.77) | 1.65 (1.54, 1.76) | 1.64 (1.54, 1.76) | 1.65 (1.54, 1.76) | 1.65 (1.54, 1.76) |
| P for trend | 1.18 (1.16, 1.21) | 1.18 (1.15, 1.21) | 1.18 (1.15, 1.20) | 1.18 (1.16, 1.21) | 1.18 (1.16, 1.21) |
| MLR (per SD increase) | 1.38 (1.35, 1.42) | 1.38 (1.34, 1.42) | 1.38 (1.34, 1.42) | 1.38 (1.34, 1.42) | 1.38 (1.35, 1.42) |
| MLR quartiles |  |  |  |  |  |
| Q1 (<0.17) | 1 (reference) | 1 (reference) | 1 (reference) | 1 (reference) | 1 (reference) |
| Q2 (0.17-0.22) | 1.24 (1.16, 1.33) | 1.24 (1.16, 1.32) | 1.24 (1.16, 1.32) | 1.24 (1.16, 1.32) | 1.24 (1.16, 1.33) |
| Q3 (0.22-0.28) | 1.60 (1.49, 1.71) | 1.59 (1.49, 1.70) | 1.59 (1.49, 1.70) | 1.59 (1.49, 1.70) | 1.59 (1.49, 1.70) |
| Q4 (≥0.28) | 2.21 (2.07, 2.37) | 2.20 (2.05, 2.35) | 2.20 (2.05, 2.35) | 2.20 (2.05, 2.35) | 2.20 (2.06, 2.36) |
| P for trend | 1.30 (1.27, 1.33) | 1.30 (1.27, 1.33) | 1.30 (1.27, 1.33) | 1.30 (1.27, 1.33) | 1.30 (1.27, 1.33) |

Values more than 3SD from the mean were deemed as outliers, they were removed and the analysis repeated.

Model 1: Unadjusted (univariate analysis).

Model 2: Adjusted for age, sex, smoking status, alcohol consumption, and duration of hypertension.

Model 3: Model 2 plus additional adjustments for systolic blood pressure, diastolic blood pressure, body mass index, waist circumference, diabetes mellitus, dyslipidemia, and coronary artery disease.

Model 4: Model 3 plus further adjustments for AST/ALT, GGT, serum creatinine, uric acid, total cholesterol, triglyceride, HDL-C, LDL-C, fasing blood glucose, HbA1c, hs-CRP, and TyG index.

Model 5: Model 4 plus adjustments for the use of antidiabetic medications, lipid-lowering agents, and antihypertensive drugs.

Abbreviations: SD, standard deviation; OR, odds ratio; CI, confidence interval. Other abbreviations are as defined in Table 1.

**Table S3**. Sensitivity analysis of the association between inflammatory biomarkers and MAFLD risk excluding participants with excessive alcohol consumption.

| Exposure | Model 1 | Model 2 | Model 3 | Model 4 | Model 5 |
| --- | --- | --- | --- | --- | --- |
| OR (95% CI) | OR (95% CI) | OR (95% CI) | OR (95% CI) | OR (95% CI) |
| AISI (per SD increase) | 1.75 (1.69, 1.80) | 1.74 (1.69, 1.80) | 1.74 (1.69, 1.80) | 1.74 (1.69, 1.80) | 1.75 (1.70, 1.81) |
| AISI quartiles |  |  |  |  |  |
| Q1 (<121.91) | 1 (reference) | 1 (reference) | 1 (reference) | 1 (reference) | 1 (reference) |
| Q2 (121.91-185.83) | 1.21 (1.14, 1.29) | 1.21 (1.14, 1.29) | 1.21 (1.14, 1.29) | 1.21 (1.14, 1.29) | 1.21 (1.14, 1.29) |
| Q3 (185.83-279.52) | 2.13 (2.01, 2.27) | 2.13 (2.00, 2.27) | 2.14 (2.01, 2.27) | 2.14 (2.01, 2.27) | 2.14 (2.01, 2.28) |
| Q4 (≥279.53) | 3.20 (3.01, 3.41) | 3.19 (3.00, 3.40) | 3.19 (3.00, 3.40) | 3.20 (3.00, 3.41) | 3.22 (3.02, 3.43) |
| P for trend | 1.50 (1.47, 1.53) | 1.50 (1.47, 1.53) | 1.50 (1.47, 1.53) | 1.50 (1.47, 1.53) | 1.50 (1.47, 1.53) |
| SIRI (per SD increase) | 1.63 (1.58, 1.67) | 1.62 (1.58, 1.67) | 1.62 (1.58, 1.67) | 1.62 (1.58, 1.67) | 1.63 (1.58, 1.67) |
| SIRI quartiles |  |  |  |  |  |
| Q1 (<0.55) | 1 (reference) | 1 (reference) | 1 (reference) | 1 (reference) | 1 (reference) |
| Q2 (0.55-0.78) | 1.38 (1.30, 1.47) | 1.38 (1.30, 1.47) | 1.38 (1.30, 1.47) | 1.38 (1.30, 1.47) | 1.38 (1.30, 1.47) |
| Q3 (0.78-1.11) | 1.99 (1.87, 2.11) | 1.98 (1.87, 2.11) | 1.99 (1.87, 2.11) | 1.99 (1.87, 2.11) | 1.99 (1.87, 2.12) |
| Q4 (≥1.11) | 3.22 (3.02, 3.43) | 3.21 (3.01, 3.42) | 3.21 (3.01, 3.42) | 3.21 (3.02, 3.42) | 3.23 (3.03, 3.44) |
| P for trend | 1.47 (1.44, 1.50) | 1.47 (1.44, 1.50) | 1.47 (1.44, 1.50) | 1.47 (1.44, 1.50) | 1.47 (1.44, 1.50) |
| SII (per SD increase) | 1.58 (1.54, 1.63) | 1.58 (1.53, 1.62) | 1.58 (1.53, 1.62) | 1.58 (1.53, 1.62) | 1.58 (1.54, 1.62) |
| SII quartiles |  |  |  |  |  |
| Q1 (<333.66) | 1 (reference) | 1 (reference) | 1 (reference) | 1 (reference) | 1 (reference) |
| Q2 (333.68-450.17) | 1.36 (1.28, 1.45) | 1.36 (1.28, 1.45) | 1.36 (1.28, 1.45) | 1.36 (1.28, 1.45) | 1.36 (1.28, 1.45) |
| Q3 (450.17-611.37) | 1.99 (1.87, 2.11) | 1.98 (1.86, 2.11) | 1.99 (1.87, 2.11) | 1.99 (1.87, 2.11) | 1.99 (1.87, 2.11) |
| Q4 (≥611.39) | 2.95 (2.77, 3.14) | 2.93 (2.75, 3.12) | 2.93 (2.75, 3.12) | 2.93 (2.75, 3.12) | 2.94 (2.76, 3.13) |
| P for trend | 1.44 (1.41, 1.46) | 1.43 (1.41, 1.46) | 1.43 (1.41, 1.46) | 1.43 (1.41, 1.46) | 1.44 (1.41, 1.46) |
| NLR (per SD increase) | 1.42 (1.38, 1.46) | 1.42 (1.38, 1.45) | 1.42 (1.38, 1.45) | 1.42 (1.38, 1.45) | 1.42 (1.38, 1.45) |
| NLR quartiles |  |  |  |  |  |
| Q1 (<1.49) | 1 (reference) | 1 (reference) | 1 (reference) | 1 (reference) | 1 (reference) |
| Q2 (1.49-1.89) | 1.32 (1.24, 1.40) | 1.32 (1.24, 1.40) | 1.32 (1.24, 1.40) | 1.32 (1.24, 1.40) | 1.32 (1.24, 1.40) |
| Q3 (1.89-2.43) | 1.60 (1.51, 1.70) | 1.59 (1.50, 1.69) | 1.60 (1.50, 1.70) | 1.59 (1.50, 1.69) | 1.60 (1.50, 1.70) |
| Q4 (≥2.43) | 2.35 (2.21, 2.50) | 2.33 (2.19, 2.48) | 2.34 (2.20, 2.48) | 2.33 (2.19, 2.48) | 2.34 (2.20, 2.49) |
| P for trend | 1.32 (1.29, 1.34) | 1.31 (1.29, 1.34) | 1.31 (1.29, 1.34) | 1.31 (1.29, 1.34) | 1.31 (1.29, 1.34) |
| PLR (per SD increase) | 1.23 (1.21, 1.26) | 1.23 (1.20, 1.26) | 1.23 (1.20, 1.26) | 1.23 (1.20, 1.26) | 1.23 (1.20, 1.26) |
| PLR quartiles |  |  |  |  |  |
| Q1 (<101.92) | 1 (reference) | 1 (reference) | 1 (reference) | 1 (reference) | 1 (reference) |
| Q2 (101.92-126.79) | 1.15 (1.08, 1.22) | 1.15 (1.08, 1.22) | 1.15 (1.08, 1.22) | 1.15 (1.08, 1.22) | 1.15 (1.08, 1.22) |
| Q3 (126.79-158.28) | 1.36 (1.28, 1.44) | 1.35 (1.28, 1.44) | 1.36 (1.28, 1.44) | 1.35 (1.27, 1.44) | 1.35 (1.27, 1.44) |
| Q4 (≥158.28) | 1.65 (1.56, 1.76) | 1.65 (1.55, 1.75) | 1.65 (1.55, 1.75) | 1.65 (1.55, 1.75) | 1.65 (1.55, 1.75) |
| P for trend | 1.18 (1.16, 1.21) | 1.18 (1.16, 1.20) | 1.18 (1.16, 1.20) | 1.18 (1.16, 1.20) | 1.18 (1.16, 1.20) |
| MLR (per SD increase) | 1.39 (1.35, 1.42) | 1.38 (1.35, 1.42) | 1.38 (1.35, 1.42) | 1.38 (1.35, 1.42) | 1.38 (1.35, 1.42) |
| MLR quartiles |  |  |  |  |  |
| Q1 (<0.17) | 1 (reference) | 1 (reference) | 1 (reference) | 1 (reference) | 1 (reference) |
| Q2 (0.17-0.22) | 1.28 (1.21, 1.36) | 1.28 (1.21, 1.36) | 1.28 (1.21, 1.36) | 1.28 (1.21, 1.36) | 1.28 (1.21, 1.36) |
| Q3 (0.22-0.28) | 1.63 (1.53, 1.73) | 1.62 (1.52, 1.72) | 1.62 (1.53, 1.72) | 1.62 (1.52, 1.72) | 1.62 (1.53, 1.72) |
| Q4 (≥0.28) | 2.23 (2.09, 2.37) | 2.21 (2.08, 2.36) | 2.22 (2.08, 2.36) | 2.21 (2.08, 2.36) | 2.22 (2.08, 2.36) |
| P for trend | 1.30 (1.28, 1.33) | 1.30 (1.27, 1.32) | 1.30 (1.27, 1.32) | 1.30 (1.27, 1.32) | 1.30 (1.27, 1.32) |

Model 1: Unadjusted (univariate analysis).

Model 2: Adjusted for age, sex, smoking status, alcohol consumption, and duration of hypertension.

Model 3: Model 2 plus additional adjustments for systolic blood pressure, diastolic blood pressure, body mass index, waist circumference, diabetes mellitus, dyslipidemia, and coronary artery disease.

Model 4: Model 3 plus further adjustments for AST/ALT, GGT, serum creatinine, uric acid, total cholesterol, triglyceride, HDL-C, LDL-C, fasing blood glucose, HbA1c, hs-CRP, and TyG index.

Model 5: Model 4 plus adjustments for the use of antidiabetic medications, lipid-lowering agents, and antihypertensive drugs.

Abbreviations: SD, standard deviation; OR, odds ratio; CI, confidence interval. Other abbreviations are as defined in Table 1.

**Table S4**. Sensitivity analysis excludes participants with severe liver fibrosis (NFS > 0.676).

| Exposure | Model 1 | Model 2 | Model 3 | Model 4 | Model 5 |
| --- | --- | --- | --- | --- | --- |
| OR (95% CI) | OR (95% CI) | OR (95% CI) | OR (95% CI) | OR (95% CI) |
| AISI (per SD increase) | 1.74 (1.69, 1.80) | 1.74 (1.68, 1.79) | 1.74 (1.68, 1.79) | 1.74 (1.69, 1.79) | 1.74 (1.69, 1.80) |
| AISI quartiles |  |  |  |  |  |
| Q1 (<121.91) | 1 (reference) | 1 (reference) | 1 (reference) | 1 (reference) | 1 (reference) |
| Q2 (121.91-185.83) | 1.21 (1.14, 1.29) | 1.21 (1.14, 1.29) | 1.22 (1.14, 1.29) | 1.21 (1.14, 1.29) | 1.22 (1.14, 1.29) |
| Q3 (185.83-279.52) | 2.13 (2.01, 2.27) | 2.13 (2.00, 2.27) | 2.14 (2.01, 2.27) | 2.14 (2.01, 2.27) | 2.14 (2.02, 2.28) |
| Q4 (≥279.53) | 3.19 (2.99, 3.39) | 3.17 (2.98, 3.38) | 3.17 (2.98, 3.38) | 3.18 (2.99, 3.39) | 3.20 (3.00, 3.41) |
| P for trend | 1.50 (1.47, 1.53) | 1.50 (1.47, 1.53) | 1.50 (1.47, 1.53) | 1.50 (1.47, 1.53) | 1.50 (1.47, 1.53) |
| SIRI (per SD increase) | 1.62 (1.58, 1.67) | 1.62 (1.57, 1.67) | 1.62 (1.57, 1.67) | 1.62 (1.57, 1.67) | 1.62 (1.58, 1.67) |
| SIRI quartiles |  |  |  |  |  |
| Q1 (<0.55) | 1 (reference) | 1 (reference) | 1 (reference) | 1 (reference) | 1 (reference) |
| Q2 (0.55-0.78) | 1.38 (1.30, 1.46) | 1.38 (1.29, 1.46) | 1.38 (1.30, 1.46) | 1.38 (1.30, 1.46) | 1.38 (1.30, 1.46) |
| Q3 (0.78-1.11) | 1.99 (1.87, 2.12) | 1.99 (1.87, 2.11) | 1.99 (1.87, 2.11) | 1.99 (1.87, 2.11) | 1.99 (1.87, 2.12) |
| Q4 (≥1.11) | 3.20 (3.01, 3.41) | 3.19 (2.99, 3.40) | 3.19 (3.00, 3.40) | 3.19 (3.00, 3.40) | 3.21 (3.01, 3.42) |
| P for trend | 1.47 (1.44, 1.50) | 1.47 (1.44, 1.50) | 1.47 (1.44, 1.50) | 1.47 (1.44, 1.50) | 1.47 (1.44, 1.50) |
| SII (per SD increase) | 1.58 (1.53, 1.62) | 1.57 (1.53, 1.62) | 1.57 (1.53, 1.62) | 1.57 (1.53, 1.62) | 1.58 (1.53, 1.62) |
| SII quartiles |  |  |  |  |  |
| Q1 (<333.66) | 1 (reference) | 1 (reference) | 1 (reference) | 1 (reference) | 1 (reference) |
| Q2 (333.68-450.17) | 1.36 (1.28, 1.45) | 1.36 (1.28, 1.45) | 1.36 (1.28, 1.45) | 1.36 (1.28, 1.45) | 1.36 (1.28, 1.45) |
| Q3 (450.17-611.37) | 1.99 (1.87, 2.11) | 1.98 (1.86, 2.11) | 1.98 (1.87, 2.11) | 1.98 (1.87, 2.11) | 1.99 (1.87, 2.11) |
| Q4 (≥611.39) | 2.95 (2.77, 3.14) | 2.93 (2.75, 3.12) | 2.93 (2.75, 3.12) | 2.93 (2.75, 3.12) | 2.94 (2.76, 3.13) |
| P for trend | 1.44 (1.41, 1.46) | 1.43 (1.41, 1.46) | 1.43 (1.41, 1.46) | 1.43 (1.41, 1.46) | 1.44 (1.41, 1.46) |
| NLR (per SD increase) | 1.42 (1.38, 1.46) | 1.42 (1.38, 1.45) | 1.42 (1.38, 1.45) | 1.42 (1.38, 1.45) | 1.42 (1.38, 1.45) |
| NLR quartiles |  |  |  |  |  |
| Q1 (<1.49) | 1 (reference) | 1 (reference) | 1 (reference) | 1 (reference) | 1 (reference) |
| Q2 (1.49-1.89) | 1.31 (1.24, 1.40) | 1.31 (1.24, 1.39) | 1.31 (1.24, 1.40) | 1.31 (1.24, 1.40) | 1.31 (1.24, 1.39) |
| Q3 (1.89-2.43) | 1.60 (1.50, 1.70) | 1.59 (1.50, 1.69) | 1.59 (1.50, 1.69) | 1.59 (1.50, 1.69) | 1.59 (1.50, 1.69) |
| Q4 (≥2.43) | 2.34 (2.20, 2.49) | 2.32 (2.18, 2.47) | 2.32 (2.19, 2.47) | 2.32 (2.18, 2.47) | 2.33 (2.19, 2.47) |
| P for trend | 1.31 (1.29, 1.34) | 1.31 (1.29, 1.34) | 1.31 (1.29, 1.34) | 1.31 (1.29, 1.34) | 1.31 (1.29, 1.34) |
| PLR (per SD increase) | 1.23 (1.21, 1.26) | 1.23 (1.20, 1.26) | 1.23 (1.20, 1.26) | 1.23 (1.20, 1.26) | 1.23 (1.20, 1.26) |
| PLR quartiles |  |  |  |  |  |
| Q1 (<101.92) | 1 (reference) | 1 (reference) | 1 (reference) | 1 (reference) | 1 (reference) |
| Q2 (101.92-126.79) | 1.15 (1.08, 1.22) | 1.15 (1.08, 1.22) | 1.15 (1.08, 1.22) | 1.15 (1.08, 1.22) | 1.15 (1.08, 1.22) |
| Q3 (126.79-158.28) | 1.36 (1.28, 1.45) | 1.36 (1.28, 1.44) | 1.36 (1.28, 1.44) | 1.36 (1.28, 1.44) | 1.36 (1.28, 1.44) |
| Q4 (≥158.28) | 1.66 (1.56, 1.76) | 1.65 (1.55, 1.75) | 1.65 (1.55, 1.75) | 1.65 (1.55, 1.75) | 1.65 (1.55, 1.75) |
| P for trend | 1.18 (1.16, 1.21) | 1.18 (1.16, 1.20) | 1.18 (1.16, 1.20) | 1.18 (1.16, 1.20) | 1.18 (1.16, 1.20) |
| MLR (per SD increase) | 1.38 (1.35, 1.42) | 1.38 (1.35, 1.41) | 1.38 (1.35, 1.41) | 1.38 (1.35, 1.41) | 1.38 (1.35, 1.42) |
| MLR quartiles |  |  |  |  |  |
| Q1 (<0.17) | 1 (reference) | 1 (reference) | 1 (reference) | 1 (reference) | 1 (reference) |
| Q2 (0.17-0.22) | 1.28 (1.20, 1.36) | 1.27 (1.20, 1.35) | 1.28 (1.20, 1.35) | 1.28 (1.20, 1.35) | 1.28 (1.20, 1.36) |
| Q3 (0.22-0.28) | 1.62 (1.52, 1.72) | 1.61 (1.52, 1.71) | 1.61 (1.52, 1.71) | 1.61 (1.52, 1.71) | 1.61 (1.52, 1.71) |
| Q4 (≥0.28) | 2.22 (2.09, 2.36) | 2.21 (2.08, 2.35) | 2.21 (2.08, 2.35) | 2.21 (2.08, 2.35) | 2.21 (2.08, 2.35) |
| P for trend | 1.30 (1.28, 1.33) | 1.30 (1.27, 1.32) | 1.30 (1.27, 1.32) | 1.30 (1.27, 1.32) | 1.30 (1.27, 1.32) |

Model 1: Unadjusted (univariate analysis).

Model 2: Adjusted for age, sex, smoking status, alcohol consumption, and duration of hypertension.

Model 3: Model 2 plus additional adjustments for systolic blood pressure, diastolic blood pressure, body mass index, waist circumference, diabetes mellitus, dyslipidemia, and coronary artery disease.

Model 4: Model 3 plus further adjustments for AST/ALT, GGT, serum creatinine, uric acid, total cholesterol, triglyceride, HDL-C, LDL-C, fasing blood glucose, HbA1c, hs-CRP, and TyG index.

Model 5: Model 4 plus adjustments for the use of antidiabetic medications, lipid-lowering agents, and antihypertensive drugs.

Abbreviations: SD, standard deviation; OR, odds ratio; CI, confidence interval. Other abbreviations are as defined in Table 1.

**Table S5**. Sensitivity analysis excludes participants with severe liver fibrosis (FIB-4 > 2.67).

| Exposure | Model 1 | Model 2 | Model 3 | Model 4 | Model 5 |
| --- | --- | --- | --- | --- | --- |
| OR (95% CI) | OR (95% CI) | OR (95% CI) | OR (95% CI) | OR (95% CI) |
| AISI (per SD increase) | 1.63 (1.59, 1.67) | 1.63 (1.59, 1.67) | 1.63 (1.59, 1.67) | 1.63 (1.59, 1.67) | 1.64 (1.60, 1.68) |
| AISI quartiles |  |  |  |  |  |
| Q1 (<121.91) | 1 (reference) | 1 (reference) | 1 (reference) | 1 (reference) | 1 (reference) |
| Q2 (121.91-185.83) | 1.22 (1.15, 1.30) | 1.22 (1.15, 1.30) | 1.22 (1.15, 1.30) | 1.22 (1.15, 1.30) | 1.22 (1.15, 1.30) |
| Q3 (185.83-279.52) | 2.09 (1.97, 2.22) | 2.09 (1.96, 2.22) | 2.09 (1.97, 2.23) | 2.09 (1.97, 2.23) | 2.10 (1.97, 2.23) |
| Q4 (≥279.53) | 3.21 (3.02, 3.42) | 3.20 (3.00, 3.41) | 3.20 (3.00, 3.41) | 3.21 (3.01, 3.42) | 3.22 (3.03, 3.44) |
| P for trend | 1.50 (1.47, 1.53) | 1.50 (1.47, 1.53) | 1.50 (1.47, 1.53) | 1.50 (1.47, 1.53) | 1.50 (1.47, 1.53) |
| SIRI (per SD increase) | 1.56 (1.52, 1.59) | 1.55 (1.52, 1.59) | 1.55 (1.52, 1.59) | 1.55 (1.52, 1.59) | 1.56 (1.52, 1.59) |
| SIRI quartiles |  |  |  |  |  |
| Q1 (<0.55) | 1 (reference) | 1 (reference) | 1 (reference) | 1 (reference) | 1 (reference) |
| Q2 (0.55-0.78) | 1.38 (1.30, 1.47) | 1.38 (1.30, 1.47) | 1.38 (1.30, 1.47) | 1.38 (1.30, 1.47) | 1.38 (1.30, 1.47) |
| Q3 (0.78-1.11) | 1.99 (1.87, 2.11) | 1.98 (1.87, 2.11) | 1.99 (1.87, 2.11) | 1.99 (1.87, 2.11) | 1.99 (1.87, 2.12) |
| Q4 (≥1.11) | 3.19 (3.00, 3.40) | 3.18 (2.98, 3.38) | 3.18 (2.98, 3.39) | 3.18 (2.99, 3.39) | 3.19 (3.00, 3.40) |
| P for trend | 1.47 (1.44, 1.50) | 1.47 (1.44, 1.49) | 1.47 (1.44, 1.50) | 1.47 (1.44, 1.50) | 1.47 (1.44, 1.50) |
| SII (per SD increase) | 1.50 (1.46, 1.53) | 1.49 (1.46, 1.53) | 1.49 (1.46, 1.53) | 1.49 (1.46, 1.53) | 1.50 (1.46, 1.53) |
| SII quartiles |  |  |  |  |  |
| Q1 (<333.66) | 1 (reference) | 1 (reference) | 1 (reference) | 1 (reference) | 1 (reference) |
| Q2 (333.68-450.17) | 1.35 (1.27, 1.43) | 1.35 (1.27, 1.43) | 1.35 (1.27, 1.43) | 1.34 (1.26, 1.43) | 1.34 (1.26, 1.43) |
| Q3 (450.17-611.37) | 1.98 (1.86, 2.10) | 1.97 (1.86, 2.10) | 1.98 (1.86, 2.10) | 1.98 (1.86, 2.10) | 1.98 (1.86, 2.10) |
| Q4 (≥611.39) | 2.89 (2.71, 3.07) | 2.87 (2.69, 3.05) | 2.87 (2.69, 3.05) | 2.87 (2.70, 3.06) | 2.88 (2.70, 3.07) |
| P for trend | 1.43 (1.40, 1.46) | 1.43 (1.40, 1.45) | 1.43 (1.40, 1.45) | 1.43 (1.40, 1.45) | 1.43 (1.40, 1.46) |
| NLR (per SD increase) | 1.37 (1.34, 1.40) | 1.37 (1.34, 1.40) | 1.37 (1.34, 1.40) | 1.37 (1.34, 1.40) | 1.37 (1.34, 1.40) |
| NLR quartiles |  |  |  |  |  |
| Q1 (<1.49) | 1 (reference) | 1 (reference) | 1 (reference) | 1 (reference) | 1 (reference) |
| Q2 (1.49-1.89) | 1.32 (1.24, 1.40) | 1.31 (1.24, 1.40) | 1.32 (1.24, 1.40) | 1.32 (1.24, 1.40) | 1.32 (1.24, 1.40) |
| Q3 (1.89-2.43) | 1.58 (1.49, 1.68) | 1.58 (1.48, 1.68) | 1.58 (1.49, 1.68) | 1.58 (1.48, 1.68) | 1.58 (1.48, 1.68) |
| Q4 (≥2.43) | 2.31 (2.17, 2.45) | 2.29 (2.15, 2.44) | 2.29 (2.15, 2.44) | 2.29 (2.15, 2.44) | 2.29 (2.16, 2.44) |
| P for trend | 1.31 (1.28, 1.33) | 1.31 (1.28, 1.33) | 1.31 (1.28, 1.33) | 1.30 (1.28, 1.33) | 1.31 (1.28, 1.33) |
| PLR (per SD increase) | 1.22 (1.19, 1.24) | 1.22 (1.19, 1.24) | 1.22 (1.19, 1.24) | 1.22 (1.19, 1.24) | 1.22 (1.19, 1.24) |
| PLR quartiles |  |  |  |  |  |
| Q1 (<101.92) | 1 (reference) | 1 (reference) | 1 (reference) | 1 (reference) | 1 (reference) |
| Q2 (101.92-126.79) | 1.15 (1.08, 1.22) | 1.15 (1.08, 1.22) | 1.15 (1.08, 1.22) | 1.15 (1.08, 1.22) | 1.15 (1.08, 1.22) |
| Q3 (126.79-158.28) | 1.36 (1.28, 1.44) | 1.35 (1.27, 1.44) | 1.35 (1.27, 1.44) | 1.35 (1.27, 1.44) | 1.35 (1.27, 1.44) |
| Q4 (≥158.28) | 1.62 (1.53, 1.73) | 1.62 (1.52, 1.72) | 1.62 (1.52, 1.72) | 1.62 (1.52, 1.72) | 1.62 (1.52, 1.72) |
| P for trend | 1.18 (1.15, 1.20) | 1.17 (1.15, 1.20) | 1.17 (1.15, 1.20) | 1.17 (1.15, 1.20) | 1.17 (1.15, 1.20) |
| MLR (per SD increase) | 1.35 (1.32, 1.38) | 1.34 (1.31, 1.37) | 1.34 (1.31, 1.37) | 1.34 (1.31, 1.37) | 1.34 (1.31, 1.37) |
| MLR quartiles |  |  |  |  |  |
| Q1 (<0.17) | 1 (reference) | 1 (reference) | 1 (reference) | 1 (reference) | 1 (reference) |
| Q2 (0.17-0.22) | 1.27 (1.20, 1.35) | 1.27 (1.20, 1.35) | 1.27 (1.20, 1.35) | 1.27 (1.19, 1.35) | 1.27 (1.20, 1.35) |
| Q3 (0.22-0.28) | 1.59 (1.50, 1.69) | 1.58 (1.49, 1.68) | 1.59 (1.49, 1.68) | 1.58 (1.49, 1.68) | 1.58 (1.49, 1.68) |
| Q4 (≥0.28) | 2.16 (2.03, 2.29) | 2.15 (2.02, 2.28) | 2.15 (2.02, 2.28) | 2.14 (2.02, 2.28) | 2.15 (2.02, 2.28) |
| P for trend | 1.29 (1.26, 1.31) | 1.29 (1.26, 1.31) | 1.29 (1.26, 1.31) | 1.29 (1.26, 1.31) | 1.29 (1.26, 1.31) |

Model 1: Unadjusted (univariate analysis).

Model 2: Adjusted for age, sex, smoking status, alcohol consumption, and duration of hypertension.

Model 3: Model 2 plus additional adjustments for systolic blood pressure, diastolic blood pressure, body mass index, waist circumference, diabetes mellitus, dyslipidemia, and coronary artery disease.

Model 4: Model 3 plus further adjustments for AST/ALT, GGT, serum creatinine, uric acid, total cholesterol, triglyceride, HDL-C, LDL-C, fasing blood glucose, HbA1c, hs-CRP, and TyG index.

Model 5: Model 4 plus adjustments for the use of antidiabetic medications, lipid-lowering agents, and antihypertensive drugs.

Abbreviations: SD, standard deviation; OR, odds ratio; CI, confidence interval. Other abbreviations are as defined in Table 1.

**Table S6**. E-values for the observed associations between inflammatory indices and MAFLD.

| Exposure | Adjusted model | E-value |
| --- | --- | --- |
| OR (95% CI) |
| AISI (per SD increase) | 1.74 (1.69, 1.80) | 1.97 |
| SIRI (per SD increase) | 1.62 (1.58, 1.67) | 1.86 |
| SII (per SD increase) | 1.58 (1.54, 1.62) | 1.83 |
| NLR (per SD increase) | 1.42 (1.38, 1.46) | 1.67 |
| PLR (per SD increase) | 1.23 (1.21, 1.26) | 1.46 |
| MLR (per SD increase) | 1.38 (1.35, 1.42) | 1.63 |

Adjusted model: Adjusted for age, sex, smoking status, alcohol consumption, duration of hypertension, systolic blood pressure, diastolic blood pressure, body mass index, waist circumference, diabetes mellitus, dyslipidemia, coronary artery disease, AST/ALT, GGT, serum creatinine, uric acid, total cholesterol, triglyceride, HDL-C, LDL-C, fasing blood glucose, HbA1c, hs-CRP, TyG index, the use of antidiabetic medications, lipid-lowering agents, and antihypertensive drugs.

Abbreviations: SD, standard deviation; OR, odds ratio; CI, confidence interval. Other abbreviations are as defined in Table 1.

## 3 Supplementary Figures

**
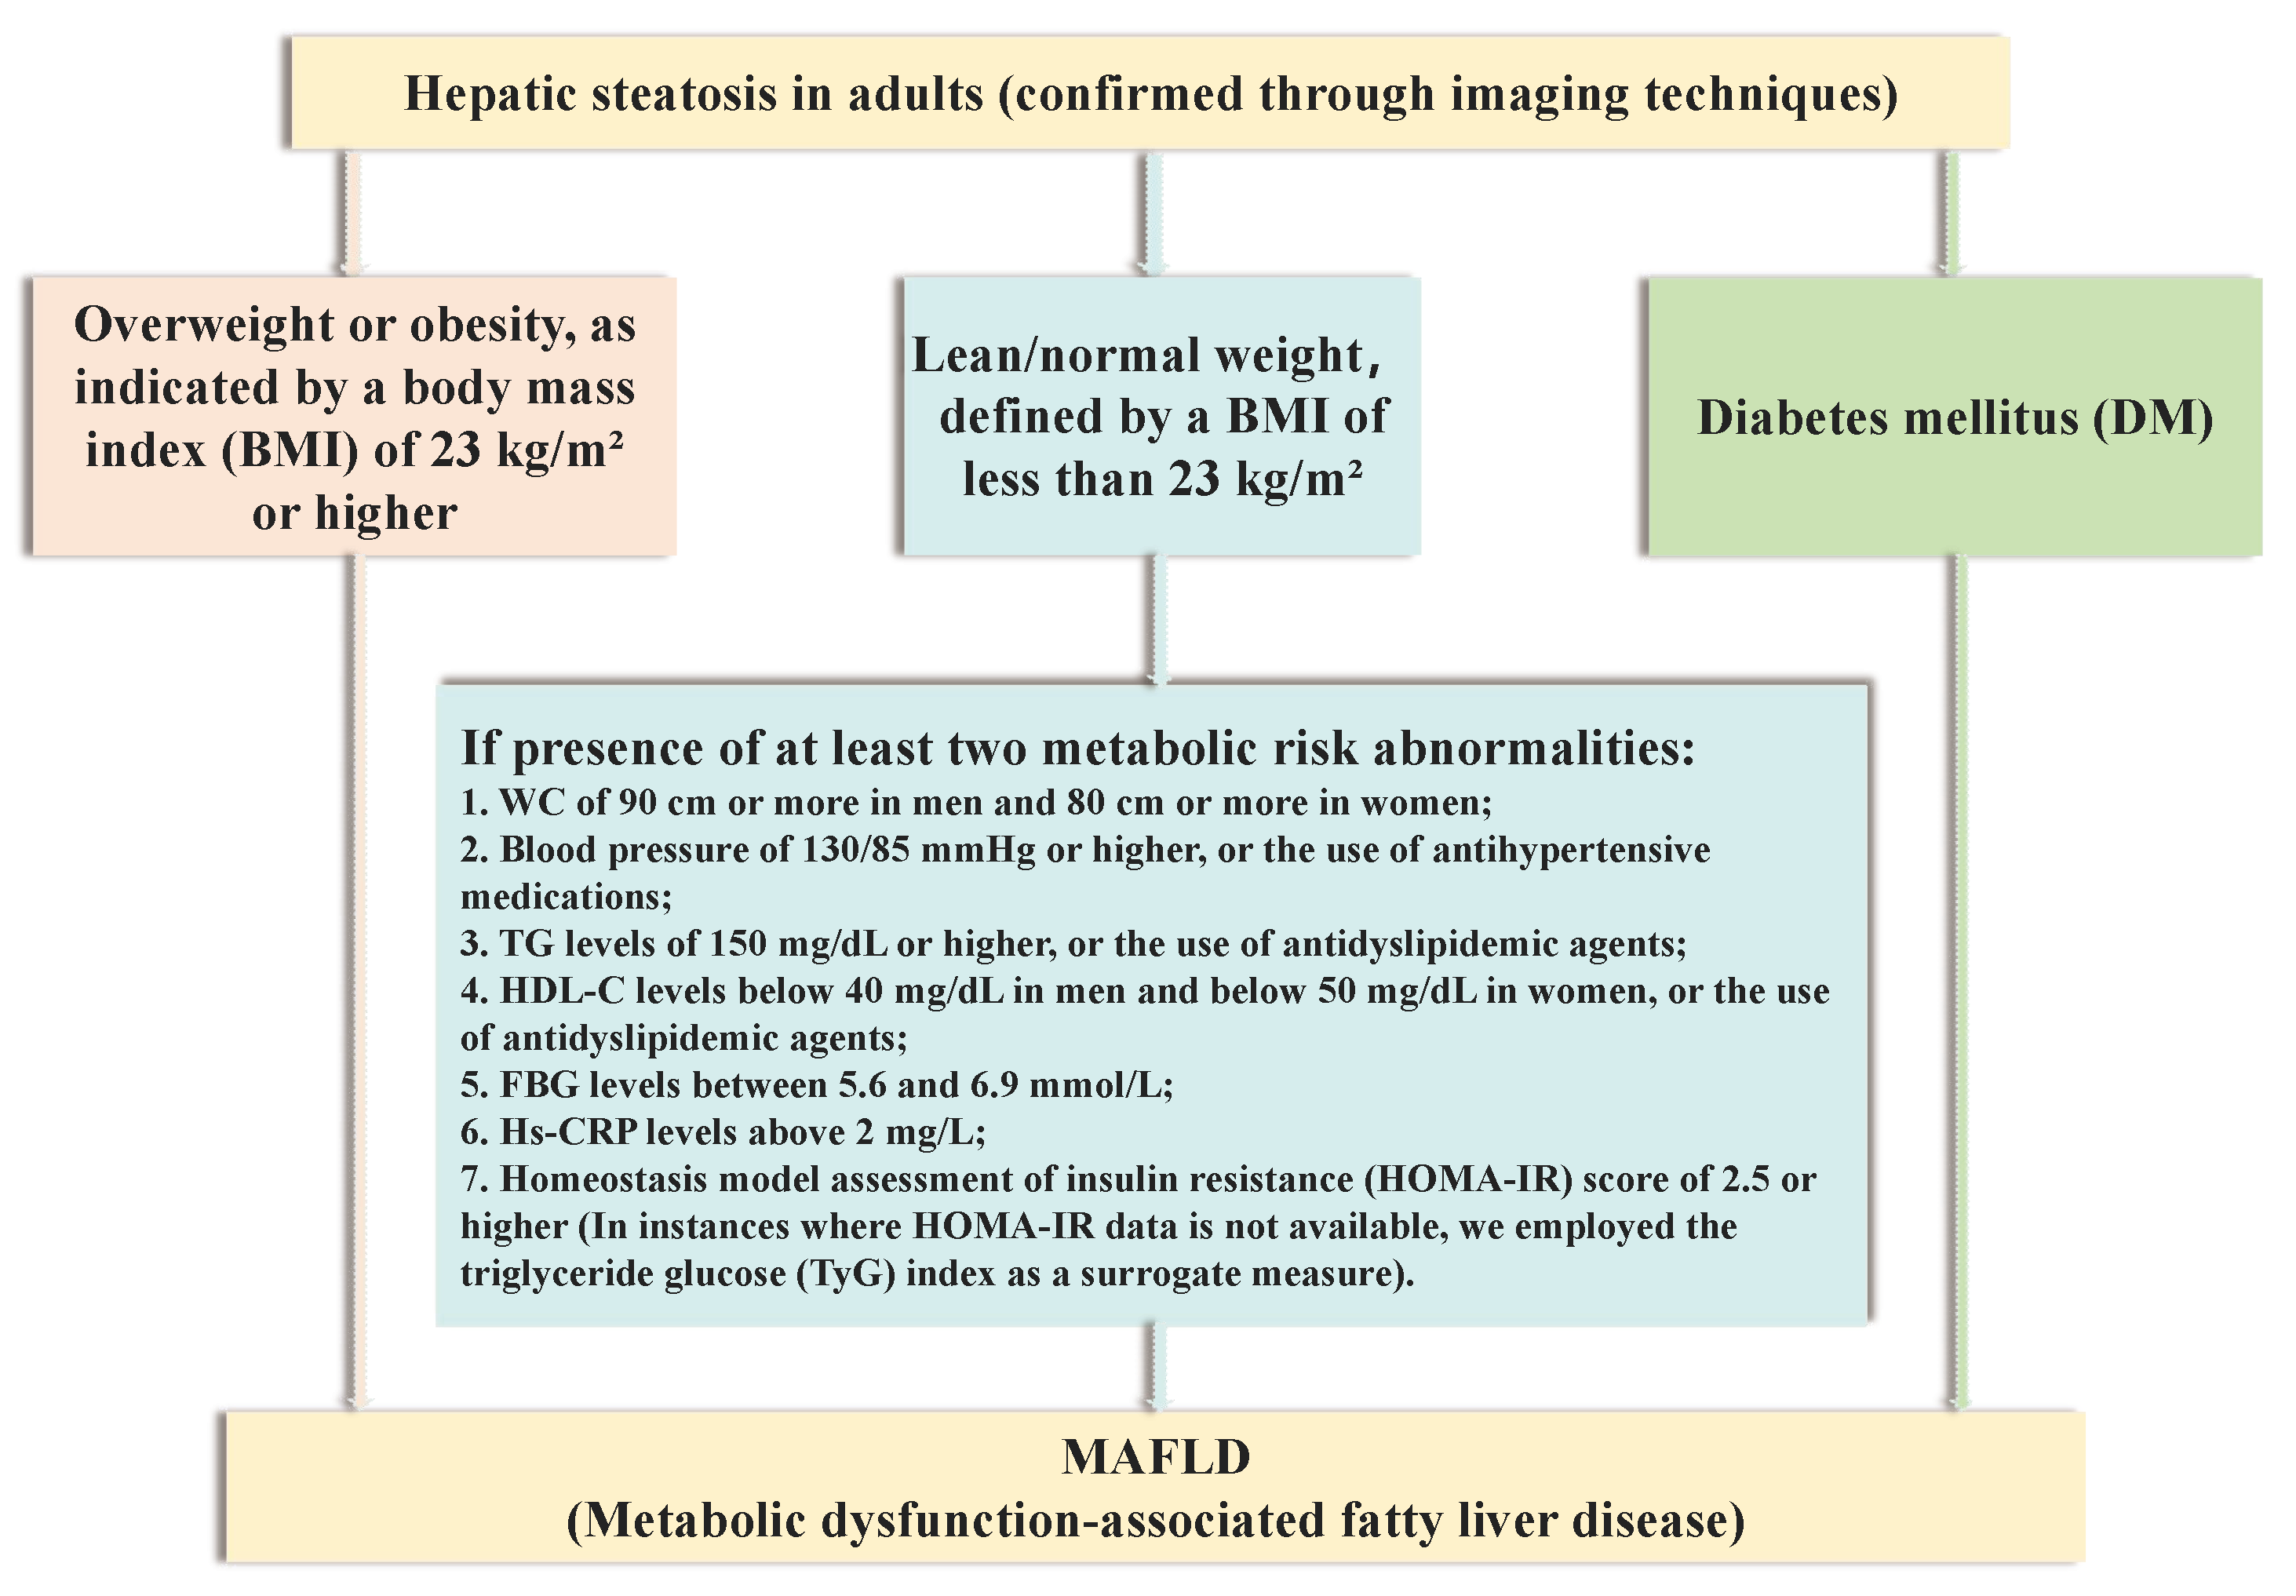
**

**Figure S1.** The diagnostic flowchart for MAFLD.

**
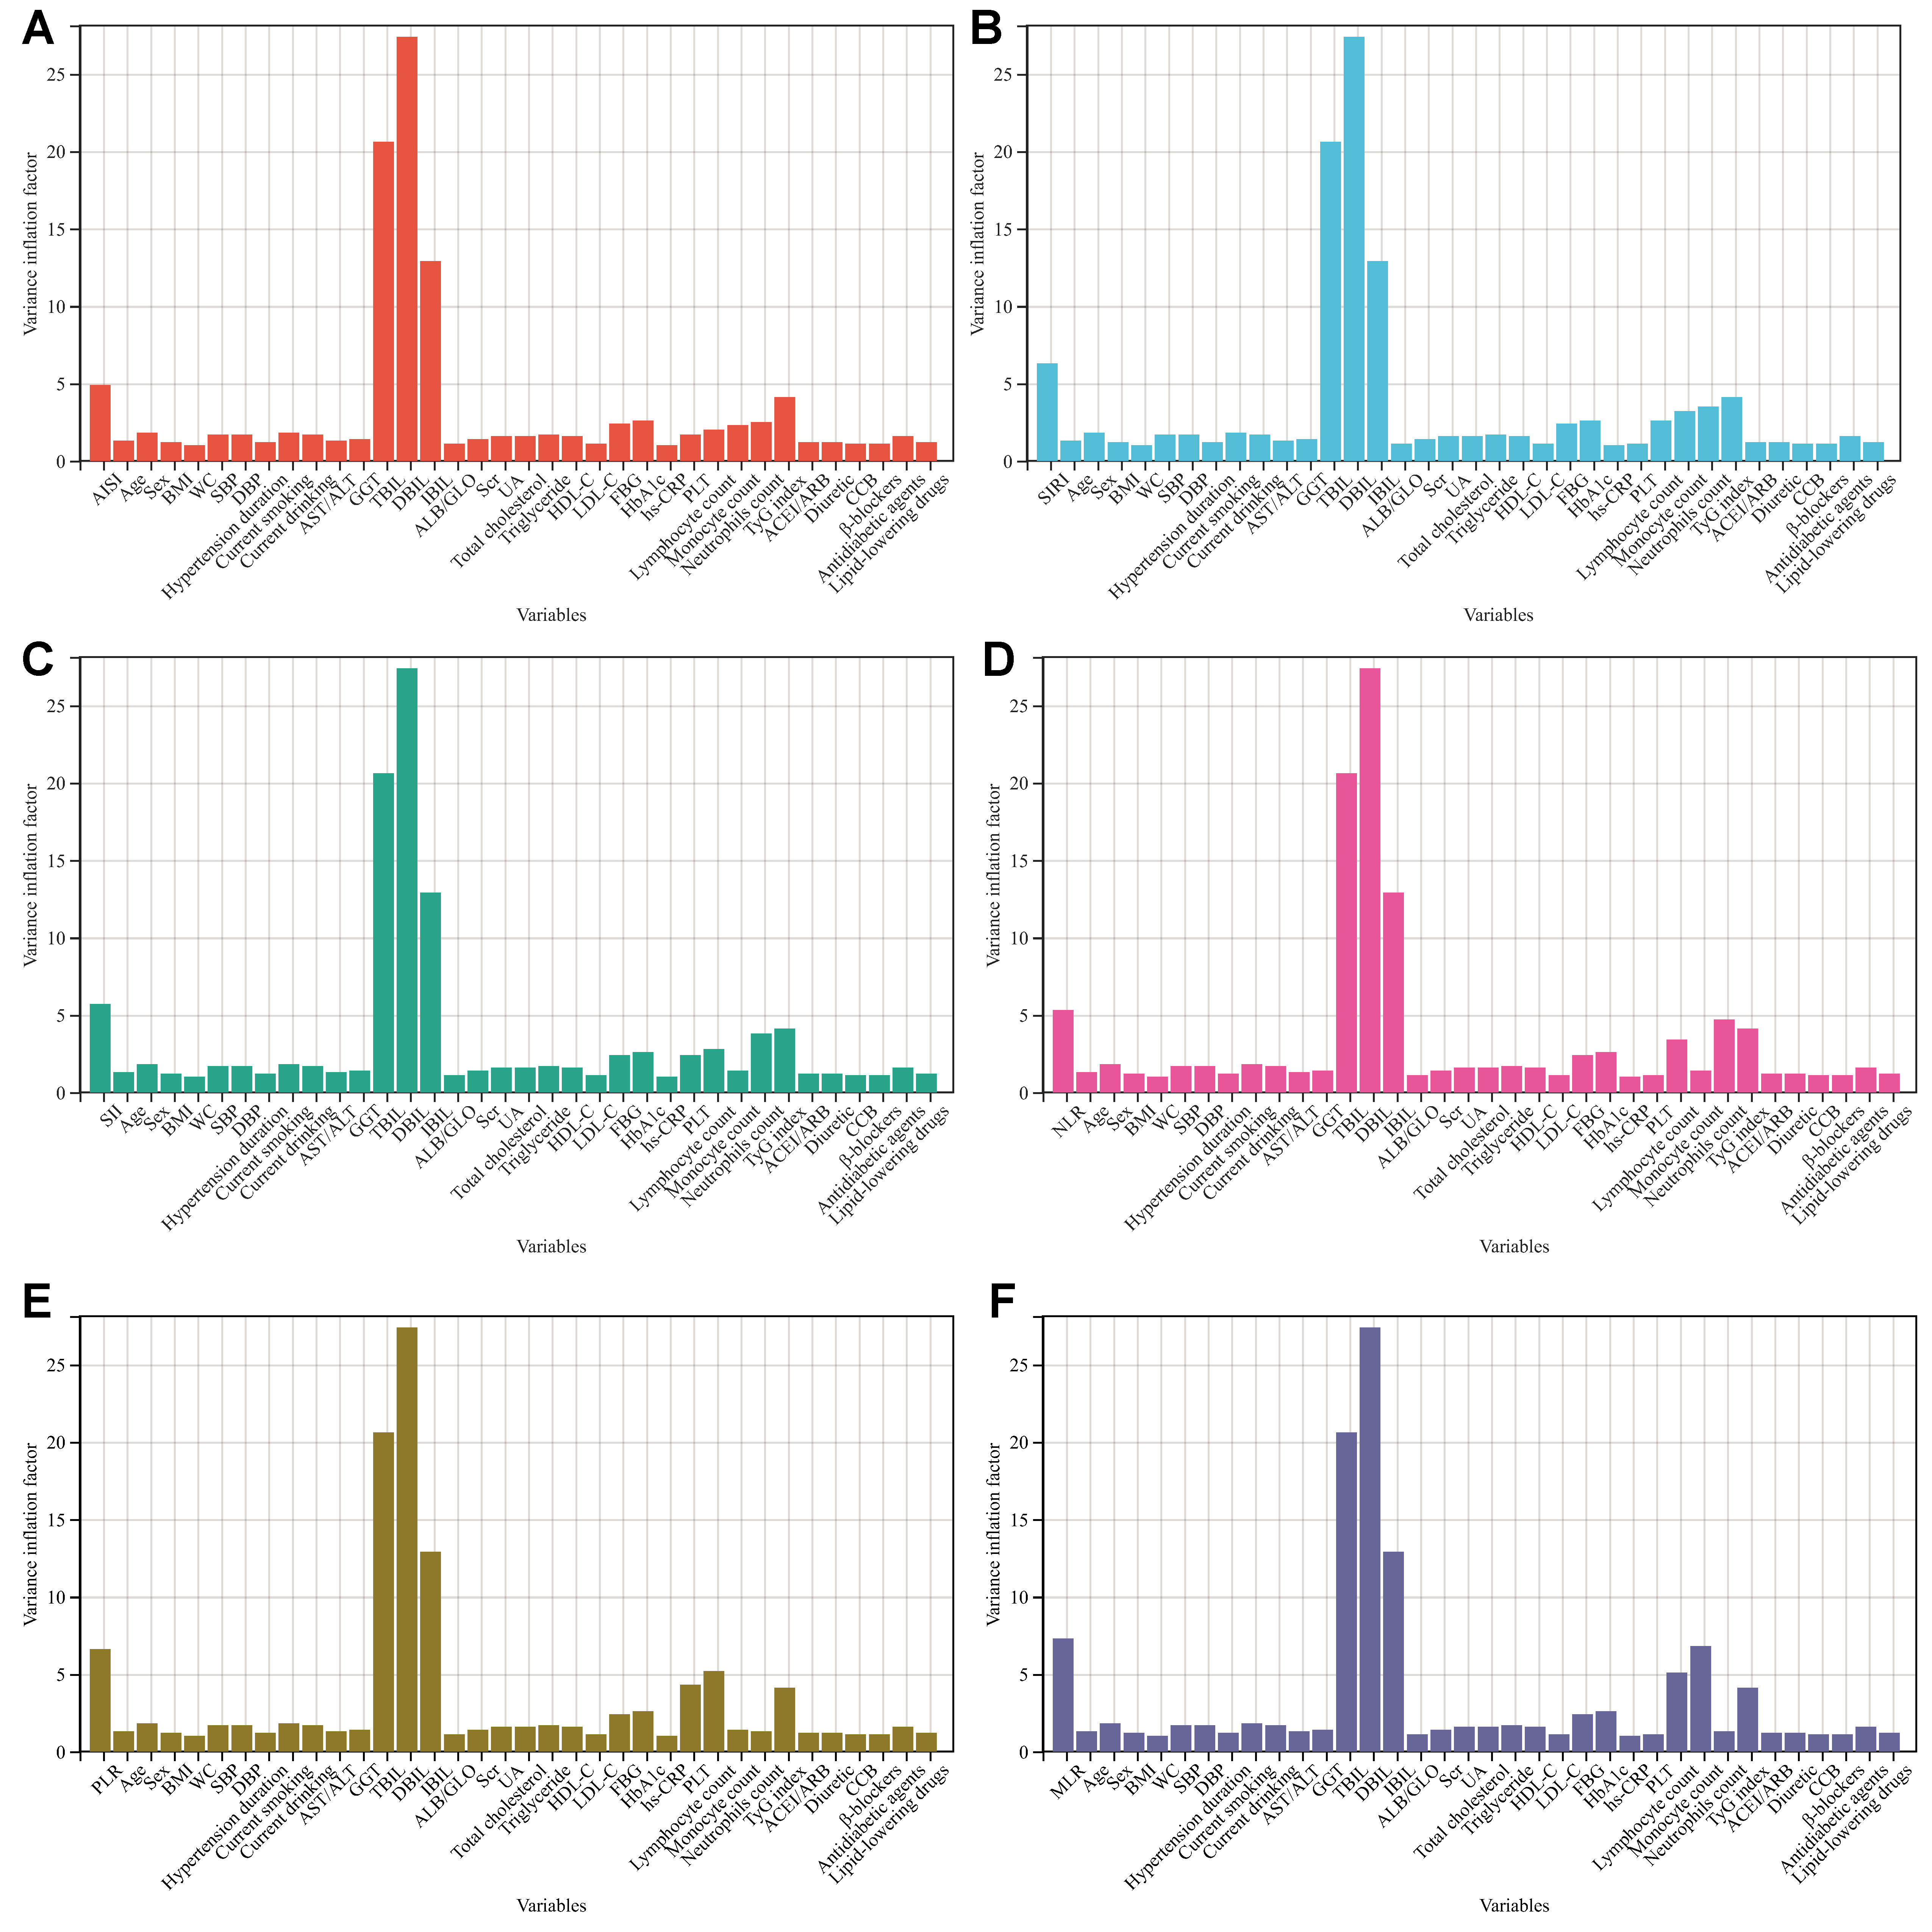
**

**Figure S2.** Collinearity diagnostics step.

VIF = 1/(1-R2). VIF step-by-step screening method: Calculate the VIF of each variable. If the maximum VIF value is ≥ 10, remove the variable with the maximum VIF value.

Abbreviations: VIF: variance inflation factors. Other abbreviations are as defined in Table 1.

**References**

[1] Farrell GC, Chitturi S, Lau GK, Sollano JD, Asia-Pacific Working Party on NAFLD, . Guidelines for the assessment and management of non-alcoholic fatty liver disease in the Asia-Pacific region: executive summary. J Gastroenterol Hepatol. 2007. 22(6): 775-7.

[2] Paik J, Golabi P, Younoszai Z, Mishra A, Trimble G, Younossi ZM. Chronic kidney disease is independently associated with increased mortality in patients with nonalcoholic fatty liver disease. Liver Int. 2019. 39(2): 342-352.

[3] Shah AG, Lydecker A, Murray K, et al. Comparison of noninvasive markers of fibrosis in patients with nonalcoholic fatty liver disease. Clin Gastroenterol Hepatol. 2009. 7(10): 1104-12.
